1 **Title page**

2

3 **Population health impacts and associated monetary gains from**  
4 **the taxation of salt and sugar in the United Kingdom**

5

6 Patricia Eustachio Colombo<sup>1,2</sup>, James Milner<sup>1,3</sup>, Silvia Pastorino<sup>1,3</sup>, Rosemary Green<sup>1</sup>

7 <sup>1</sup>Centre on Climate Change and Planetary Health, London School of Hygiene and Tropical  
8 Medicine, London, UK

9 <sup>2</sup>Department of Biosciences and Nutrition, Karolinska Institutet, Stockholm, Sweden

10 <sup>3</sup>Department of Public Health, Environments and Society, London School of Hygiene and  
11 Tropical Medicine, London, UK

\* Correspondence: Patricia Eustachio Colombo, [patricia.eustachio-colombo@lshtm.ac.uk](mailto:patricia.eustachio-colombo@lshtm.ac.uk)

12 **Rosemary Green** is an Editor for Current Developments in Nutrition and played no role in  
13 the Journal's evaluation of the manuscript.

14 **Funding:** This project received funding from Impact on Urban Health. PEC had financial  
15 support from the Swedish Research Council (VR, grant nr. 2022-00344) for the submitted  
16 work. The funders had no role in the design of the study; in the collection, analyses, or  
17 interpretation of data; in the writing of the manuscript, or in the decision to publish the results.

18 **Abbreviations**

19 **AF** Atrial Fibrillation

20 **BMI** Body mass index

21 **DHSC** Department of Health and Social Care

22 **GBD** Global Burden of Disease

23 **IHD** Ischemic heart disease

|    |             |                             |
|----|-------------|-----------------------------|
| 24 | <b>NFS</b>  | National Food Strategy      |
| 25 | <b>NHS</b>  | National Health Services    |
| 26 | <b>QALY</b> | Quality Adjusted Life Year  |
| 27 | <b>RR</b>   | Relative Risk               |
| 28 | <b>SDIL</b> | Sugary drinks industry levy |
| 29 | <b>SSB</b>  | Sugar sweetened beverages   |
| 30 | <b>YLG</b>  | Years of Life Gained        |
| 31 | <b>YLL</b>  | Years of Life Lost          |
| 32 |             |                             |

## 33 **Abstract**

34 **Background:** Poor diets contribute significantly and increasingly to the burden of chronic  
35 diseases in the United Kingdom, impacting both health and the economy. The introduction of  
36 fiscal measures that target unhealthy foods can provide a near-unique opportunity to achieve  
37 shifts towards healthier diets while raising ring-fenced revenue for spending on healthcare.

38 **Objective:** To estimate the expected health and economic benefits from the reduction in  
39 consumption of salt and sugar that could be expected from the introduction of a proposed  
40 £3/kg tax on sugar and a £6/kg tax on salt.

41 **Methods:** Life-table modelling was used to estimate the expected health and economic  
42 benefits from the reduction in consumption of salt and sugar for four scenarios, each  
43 reflecting different manufacturer and consumer responses to the proposed tax. Relative risks for  
44 24 different disease-risk pairs were applied, exploring direct and indirect pathways between  
45 salt and sugar consumption, and mortality and morbidity.

46 **Results:** The results show that life expectancy in the UK could be increased by 1.7 and nearly  
47 5 months, depending on the degree of industry and consumer response to the tax. The tax  
48 could also lead to almost 2 million fewer cases of preventable chronic diseases with additional  
49 economic benefits of approximately £27 to £78 billion from avoided ill-health over 25 years.  
50 The largest health benefits would accrue from reduced mortality and morbidity from  
51 cardiovascular diseases.

52 **Conclusions:** Significant benefits to both population health and the economy could be  
53 expected from extending the current tax on sugar sweetened beverages to other sugary foods  
54 and from adding a tax on foods high in salt. The proposed dietary changes are likely to be  
55 insufficient to reach national public health targets for obesity and chronic disease prevention;

56 hence, additional measures to reduce the burden of chronic disease in the UK will be equally  
57 critical to consider.

58 **Keywords:** fiscal measures, health promotion, disease prevention, healthy eating, obesity  
59 reduction

60

61

62

## 63 **Introduction**

64 Suboptimal diet, characterised by factors such as low intakes of fruits and vegetables and high  
65 intakes of salt and added sugars, contributes to an estimated 90,000 deaths every year in the  
66 UK [1]. More than half of over-45s are living with health conditions for which diet is a widely  
67 recognised contributing risk factor, including cardiovascular disease, type-2 diabetes, and  
68 obesity. As things stand, obesity is expected to continue increasing [2]. By 2035, type 2  
69 diabetes is projected to cost the UK National Health Services (NHS) £15 billion a year,  
70 equivalent to one and a half times as much as cancer does today [3]. Halting this trajectory  
71 will be crucial for protecting the future of the UK's health service.

72 Limiting intakes of salt and added sugar is one important action to prevent diet-related disease  
73 [1]. Current intakes of added sugar in the UK are, on average, 55g/day (9.9 E%) in men and  
74 44g (9.9E%) in women [4]. This represents nearly double the recommendation of no more  
75 than 30g/5E% from added sugars [5]. At the same time current average intakes of salt are  
76 9.2g/ day for men and 7.6g/day for women [4], exceeding the daily recommendation of no  
77 more than 6g/day in adults [5].

78 Significant behaviour change would be needed to meet the recommendations for salt and  
79 added sugars in the UK. The limited success of the “5-a-day” campaign since 2003 suggests  
80 that information measures alone are not enough to change behaviour [6]. However, evidence  
81 from the implementation of the UK Soft Drinks Industry Levy (SDIL) [7] suggests that  
82 targeted fiscal measures could be effective in steering the consumption of specific foods  
83 among consumers. Since its introduction in 2018, this levy has reduced intake of sugar from  
84 sugar sweetened beverages (SSB) by an average of 10%, with greater reductions amongst  
85 people on lower incomes [8]. Recent poll-data shows that more than two thirds (68%) of the  
86 UK public support an extension of the SDIL to other food categories [9].

87 In 2021, the National Food Strategy: The Plan (NFS) [10] suggested extending the SDIL and  
88 proposed that the UK Government should introduce a £3/kg tax on sugar (and some  
89 ingredients used for sweetening, but not non-nutritive sweeteners) and a £6/kg tax on salt.  
90 This would impact all manufactured food categories in which sugar or salt is used as an  
91 ingredient. The report argued that this would generate an incentive for manufacturers to lower  
92 the sugar and salt content of their products, through reformulation of recipes or by reduction  
93 of portion sizes.

94 This study estimates the expected health benefits from the reduction in consumption of salt  
95 and sugar, and the associated reduction in calories, for four scenarios developed through  
96 previous work by the Institute for Fiscal Studies [11], based on the proposed tax [10], each  
97 reflecting different manufacturer and consumer responses to a proposed extension of the  
98 SDIL to foods high in sugar and/or salt. We also quantify the potential economic impacts  
99 resulting from changes in salt and sugar consumption.

100

## 101 **Material and methods**

### 102 *Scenarios*

103 In this work, we adopted a methodology that combined elements of the Department of Health  
104 and Social Care (DHSC) calorie model [12] (i.e. the calculation of changes in body-mass  
105 index (BMI) across the population due to a hypothetical reduction in energy intake from  
106 sugar) with life table modelling to quantify health impacts from a reduced intake of sugar and  
107 salt in the UK. The potential sugar and salt reduction from the application of the levy  
108 proposed in the NFS has previously been calculated by the Institute for Fiscal Studies [10,  
109 11]. Briefly, purchase panel data from the 2019 Kantar Fast Moving Consumer Goods I (Take  
110 Home) and 2016-2019 Kantar Out of Home Purchase Panel data were used to estimate

111 changes in intakes which depend on the degrees of reformulation by the industry and the  
112 consumer response. There is considerable uncertainty about both of these aspects. Hence, four  
113 different scenarios based on this previous work were tested, each reflecting different  
114 manufacturer and consumer responses to a proposed tax. Reformulation targets for different  
115 food groups set by Public Health England(PHE)—i.e. a 20% reduction in sugar across all  
116 food groups [13], and food-group specific targets for salt [14]—were used to define the four  
117 scenarios:

- 118 1. The “**Low-Low**” scenario: Low industry change (firms reformulate to 30% of PHE  
119 targets), and low consumer change (consumers substitute away from products by one  
120 third of the price increase)
- 121 2. The “**High-No**” scenario: High industry change (full reformulation to PHE targets),  
122 but no consumer change (consumers do not respond to price increases)
- 123 1. The “**High-Moderate**” scenario: High industry change (full reformulation to PHE  
124 targets), and moderate consumer change (consumers substitute away from products by  
125 70% of the price increase)
- 126 2. The “**High-High**” scenario: High industry change (full reformulation to PHE targets),  
127 and high consumer change (consumers substitute away from products by the same  
128 amount as the price increase)

129

130 According to these calculations a reduction in sugar intake of 4.5-12.6g per day (a 10%-29%  
131 reduction [4]) in women and 5.3-15.0g (a 10-27% reduction [4]) in men could be achieved  
132 (**Table 1**). A reduction in salt intake of 0.2-0.7g per day (a 3-9% reduction [4]) in women and  
133 0.3-0.9g per day (a 3-10% reduction[4]) in men could be achieved by introducing the levy.

134 **Table 1.** Scenarios tested, based on previous work by the Institute for Fiscal Studies [11].

135

|       | Low-Low Scenario              | High-No Scenario              | High-Moderate Scenario        | High-High Scenario            |
|-------|-------------------------------|-------------------------------|-------------------------------|-------------------------------|
|       | Change/day<br>(males/females) | Change/day<br>(males/females) | Change/day<br>(males/females) | Change/day<br>(males/females) |
| Salt  | -0.3/-0.2 g                   | -0.7/-0.6 g                   | -0.8/-0.7 g                   | -0.9/-0.7 g                   |
| Sugar | -5.3/-4.5 g                   | -9.7/8.3g                     | -13.6/11.4 g                  | -15.0/12.6 g                  |

141 Based on previous evidence, changes in salt consumption were hypothesised to impact health  
 142 outcomes directly (stomach cancer, [15]) and indirectly (ischemic heart disease (IHD) and  
 143 stroke via hypertension [16]) (**Figure 1**). Changes in sugar consumption were hypothesised  
 144 to impact health outcomes both directly (IHD,[15, 17]), and indirectly (through BMI [17]).  
 145 Hence, like the DHSC model, our model also considered health impacts from changes in BMI  
 146 resulting from a decreased intake of calories from sugar (Figure 1).

147



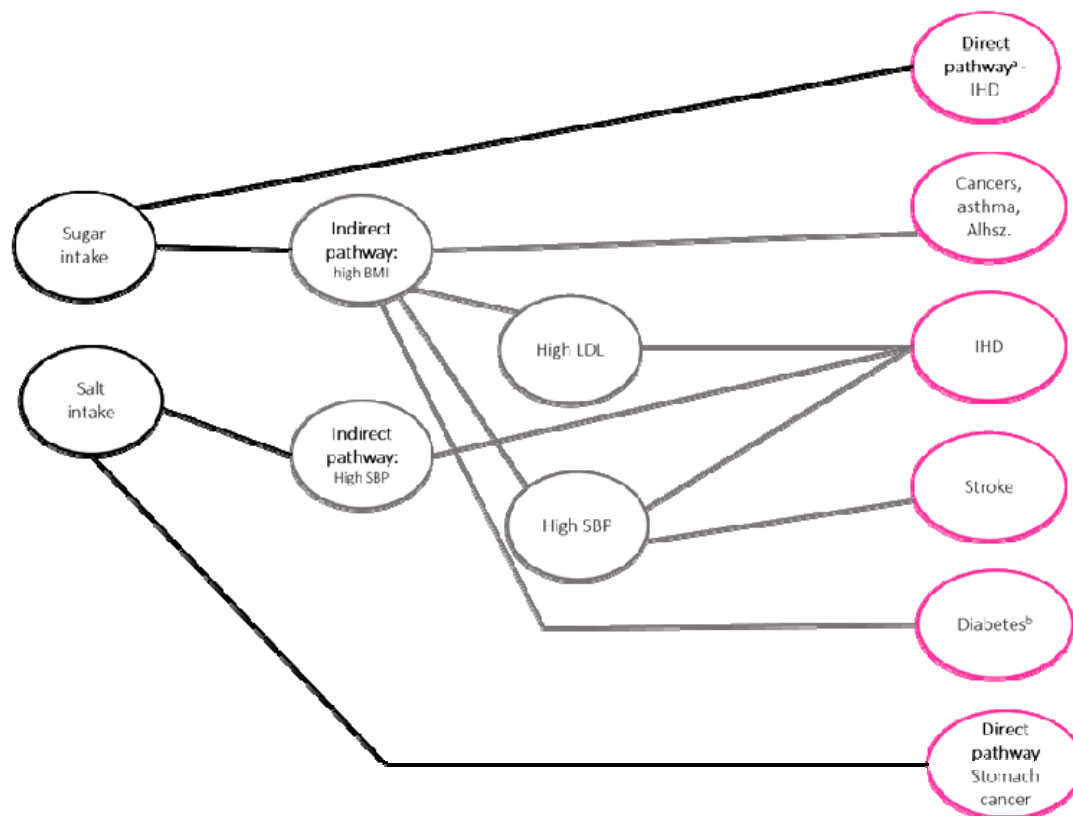

148

149 **Figure 1.** Pathways through which sugar and salt intake affects disease outcomes directly and  
150 indirectly.

151 <sup>a</sup>Unregulated hepatic fructose metabolism leading to hepatic de novo lipogenesis which in turn promotes very low-density  
152 lipoprotein production [17]. <sup>b</sup>High fasting glucose levels from insulin resistance due to high free fatty acid levels (and the  
153 predominant utilisation of lipids by muscle and skeleton) leading to hyperinsulinemia and ultimately also impaired insulin  
154 secretion [17]. BMI, body-mass index; SBP, systolic blood pressure; LDL, low density lipoprotein; IHD, ischemic heart  
155 disease.

156

157 All the scenarios used the following input parameters for the health impact modelling:

- 158 • Policy lifetime and evaluation period = 25 years. The levy is implemented  
159 immediately and is active for 25 years, thus the health-related economic impacts of the  
160 levy are also evaluated over 25 years. This timeline was chosen to mirror that used for  
161 the NFS [10], but also because this is long enough to show significant health impacts  
162 from the policies in question. However, impacts are likely to continue beyond 25

163 years, so the net present value of these policies could increase further as more years  
164 are added to the model.

- 165 • The health impacts are quantified for the entire adult population in the UK.
- 166 • Scenarios have age and gender specific calorie reductions, based on previous work by  
167 the Institute for Fiscal Studies [11] and given in Table 2.

168 The primary outcomes of the modelling were: i) changes in life expectancy and Years of Life  
169 Gained (YLG) from changes in mortality accumulated over 25 years, ii) changes in morbidity  
170 (new cases of different diseases) accumulated over 25 years, iii) changes in Quality Adjusted  
171 Life Years (QALYs) from changes in YLG and morbidity over 25 years, and iv) associated  
172 monetary changes (£) of the changes in QALYs.

173

#### 174 *Quantifying reductions in kcal and BMI*

175 In accordance with the DHSC calorie model, 1 gram of reduced sugar intake per day was  
176 translated to 4 kcal reduced energy intake from sugar, which in turn was assumed to  
177 correspond to a 0.042kg reduction in body weight using the steady-state models originally  
178 developed by Kevin Hall *et al* [18]. Based on the four scenarios, and these assumptions, the  
179 energy intake from sugar was translated to a change in body weight ranging from -0.76 to -  
180 2.12kg in men, and -0.89 to -2.52kg in women (**Table 2**) with half of the weight change being  
181 achieved in about 1 year and 95% of the weight change in about 3 years [18].

182

183 **Table 2.** Scenario specific reductions in calories, corresponding reductions in body weight,  
 184 baseline BMI, average adult BMI resulting from a reduced energy intake from sugar and  
 185 difference between baseline vs. modelled BMI, grouped by gender.

| Scenario           | kcal  | Weight reduction (kg) <sup>a</sup> | Average BMI baseline | Average BMI modelled | BMI difference | 186<br>187<br>188<br>189<br>190<br>191<br>192<br>193<br>194<br>195<br>196<br>197<br>198<br>199<br>200 | <sup>a</sup> Assuming that 0.042 kg body weight is lost per calorie reduct ion [18]. |
|--------------------|-------|------------------------------------|----------------------|----------------------|----------------|-------------------------------------------------------------------------------------------------------|--------------------------------------------------------------------------------------|
| <b>Males 18+</b>   |       |                                    |                      |                      |                |                                                                                                       |                                                                                      |
| Low-Low            | -21.2 | -0.89                              | 27.61                | 27.41                | -0.20          |                                                                                                       |                                                                                      |
| High-No            | -38.8 | -1.63                              | 27.61                | 27.24                | -0.37          |                                                                                                       |                                                                                      |
| High-Moderate      | -54.4 | -2.28                              | 27.61                | 27.09                | -0.52          |                                                                                                       |                                                                                      |
| High-High          | -60   | -2.52                              | 27.61                | 27.04                | -0.57          |                                                                                                       |                                                                                      |
| <b>Females 18+</b> |       |                                    |                      |                      |                |                                                                                                       |                                                                                      |
| Low-Low            | -18   | -0.76                              | 27.15                | 26.99                | -0.16          |                                                                                                       |                                                                                      |
| High-No            | -33.2 | -1.39                              | 27.15                | 26.86                | -0.29          |                                                                                                       |                                                                                      |
| High-Moderate      | -45.6 | -1.92                              | 27.15                | 26.75                | -0.40          |                                                                                                       |                                                                                      |
| High-High          | -50.4 | -2.12                              | 27.15                | 26.71                | -0.44          |                                                                                                       |                                                                                      |

201

202 The UK National Diet and Nutrition Survey 2019 [4] was used to provide a nationally  
 203 representative cohort to which changes in body weight (and BMI) were applied. Each adult in  
 204 the survey cohort was first assigned their (baseline) BMI based on their height and weight.  
 205 Similar to the DHSC approach, new body weights (and thus new BMIs) resulting from a  
 206 reduced energy intake from sugar were calculated for adults considered overweight (defined  
 207 as BMI  $\geq$  25 kg/m<sup>2</sup>) only. The average BMI of the entire baseline adult population was then  
 208 compared to the average BMI of the adult population after modifications to weights/BMIs  
 209 were computed under each of the four scenarios. The difference between the average BMI of  
 210 the total adult population at baseline and the average BMI of the total adult population when  
 211 the BMI of overweight/obese adults was changed (Table 2), were used as inputs in the life  
 212 table model. BMI changes ranged from -0.17 to -0.48 amongst men and -0.19 to -0.53  
 213 amongst women. Changes in the distribution of BMI across the adult population in the UK

214 after the reduced consumption in sugar are displayed in **Supplementary Figure 1**. The  
215 prevalence of overweight and obesity dropped by 10.9 and 10.5 percent among males and  
216 females, respectively (no data shown).

### 217 *Disease outcomes and relative risks*

218 Dose-response relationships (i.e. relative risks per unit change in consumption) between  
219 dietary intake and chronic disease morbidity and mortality were obtained from the 2019  
220 Global Burden of Disease (GBD) study [15]. The relative risk (RR) for a given dietary risk-  
221 disease pair estimates how much the risk of mortality (or morbidity) would change when the  
222 dietary risk changes. For example, the risk of IHD is reduced by 49% for each 6 g reduction  
223 in salt intake (**Table 3**). A total of 24 disease outcomes (Table 3) were considered for the  
224 modelling as they have been shown to be linked to sugar/salt consumption and/or BMI [15].  
225 Further details regarding the relative risks may be found in the Supplementary Methods.

### 226 *Health impact modelling*

227 Health impacts were the main outcome of this study, and calculated on the basis of a  
228 previously applied methodology [19], using the life table model IOMLIFET [20],  
229 implemented in R [21]. Life tables were separately generated for males and females, due to  
230 their different underlying mortality and morbidity rates. The latest (2019) data on age-specific  
231 and sex-specific population-size estimates, and on age-specific and sex-specific all-cause  
232 mortality were obtained from the Office for National Statistics [22]. Data on disease-specific  
233 mortality (mortality rates) and morbidity (incidence rates) for relevant outcomes (Table 3)  
234 were downloaded from the GBD results tool [23]. Together, these data provided the baseline  
235 input data for the UK.

236 Life table models were used to quantify changes in life expectancy and Years of Life Lost  
237 (YLL) from changes in dietary risk exposures according to the four different reformulation  
238 scenarios (Table 3). Briefly, the IOMLIFET model estimates survival patterns in the

239 population over time based on age-specific mortality rates. Based on the information of a  
240 hypothetical change in diet (risk-exposure) and a known exposure-response function (i.e.  
241 relative risk), changes in survival rates can be quantified as e.g., YLL or changes to life  
242 expectancy. YLL can be explained as the years of life lost for an individual (or a population)  
243 as a result of premature avertable mortality, considering the age at which deaths occurred.  
244 Since the dietary modifications were expected to reduce mortality rates, YLL were translated  
245 to years of life gained (YLG).

246 Changes in salt and sugar consumption were assumed to be adopted instantly while  
247 underlying mortality rates remained constant for the duration of follow-up. In cases where  
248 several dietary exposures affected the same disease, the risks were multiplied together as done  
249 previously [19]. Changes in YLG were quantified as the additional number of years of life  
250 that individuals in the UK adult population would live as a result of reducing their risk of  
251 dying prematurely from disease outcomes relating to salt and sugar consumption. Changes in  
252 morbidity (new cases of disease) were quantified using the same principles. Morbidity  
253 calculations were performed using the output population from the life table as the baseline  
254 population, to which changes in risk exposures were applied. Each morbidity calculation was  
255 performed separately based on incidence rates, and summed over the UK adult population.  
256 Changes in life expectancy at birth were calculated as the difference between the baseline life  
257 expectancy (the expected life years divided by the starting population) and the impacted  
258 (modelled) life expectancy (the impacted expected life years divided by the impacted starting  
259 population). In addition to the central RR estimates, upper and lower 95% CIs for the RRs  
260 provided by the GBD were used in the modelling to provide a range for plausible health  
261 impacts (**Supplementary Table 1**). More information regarding data management and  
262 assumptions for the health impact modelling may be found in the Supplementary Methods.

263 **Table 3.** Disease outcomes used for the modelling.

264

| Disease outcomes           | Dietary risk | Relative risk  | Change in units | Dose-response relationship |
|----------------------------|--------------|----------------|-----------------|----------------------------|
| IHD <sup>a</sup>           | Salt         | 0.510          | -6              | linear                     |
| IHD <sup>b</sup>           | Sugar        | 0.982 to 0.941 | -4.9 to -13.80  | non-linear                 |
| IHD                        | BMI          | 0.587          | -5              | linear                     |
| Ischemic stroke            | Salt         | 0.390          | -6              | linear                     |
| Ischemic stroke            | BMI          | 0.556          | -5              | linear                     |
| Stomach cancer             | Salt         | 0.976 to 0.924 | -0.25 to -0.80  | non-linear                 |
| Oesophageal cancer         | BMI          | 0.730          | -5              | linear                     |
| Colorectal cancer          | BMI          | 0.898          | -5              | linear                     |
| T2D                        | BMI          | 0.368          | -5              | linear                     |
| Gallbladder cancer         | BMI          | 0.804          | -5              | linear                     |
| Pancreatic cancer          | BMI          | 0.925          | -5              | linear                     |
| Breast cancer              | BMI          | 1.124          | -5              | linear                     |
| Uterine cancer             | BMI          | 0.628          | -5              | linear                     |
| Ovarian cancer             | BMI          | 0.976          | -5              | linear                     |
| Kidney cancer              | BMI          | 0.782          | -5              | linear                     |
| Thyroid cancer             | BMI          | 0.850          | -5              | linear                     |
| Multiple Myeloma           | BMI          | 0.917          | -5              | linear                     |
| Acute lymphoid leukaemia   | BMI          | 0.902          | -5              | linear                     |
| Chronic lymphoid leukaemia | BMI          | 0.902          | -5              | linear                     |
| Chronic myeloid leukaemia  | BMI          | 0.902          | -5              | linear                     |
| Other leukaemia            | BMI          | 0.902          | -5              | linear                     |
| Intracerebral haemorrhage  | BMI          | 0.470          | -5              | linear                     |
| Subarachnoid haemorrhage   | BMI          | 0.470          | -5              | linear                     |
| HHD                        | BMI          | 0.404          | -5              | linear                     |
| AF and flutter             | BMI          | 0.743          | -5              | linear                     |
| Asthma                     | BMI          | 0.712          | -5              | linear                     |
| Alzheimer                  | BMI          | 0.822          | -5              | linear                     |

265

266 <sup>a</sup>RRs for IHD and stroke were derived from previous research [16].

267 <sup>b</sup>RRs for sugar sweetened beverages (SSB) from GBD [15] were used as a basis for the sugar-IHD relationship. Data from  
 268 previous research [24] was used to estimate the average sugar content/100 ml of the SSB consumed in the UK. The average  
 269 sugar content/100 ml of High-sugar, Mid sugar and Low-sugar beverages was used to compute a weighted average sugar  
 270 content/100 ml of SSB. This weighted average (=7.86 g/100ml) was used as a proxy for sugar intake and was thus applied to  
 271 model the reduction of sugar.

272

273 *Quality Adjusted Life Years and monetary gains*

274 Quality Adjusted Life Years (QALYs) are a measure of disease burden, and consider both the  
275 quality and quantity of life lived. Changes in QALYs were modelled by taking into account  
276 both changes in YLG from the introduction of a salt and sugar tax, as well as the reduction in  
277 disease cases.

278 The YLG from the health impact modelling were translated to QALYs based on the  
279 assumption that an increased duration of life of one year would result in a gain of one QALY  
280 [25]. To calculate QALYs based on changes in morbidity, we used a previously developed  
281 measure from the DHSC model [12] that represents the health-related quality of life that can  
282 be associated with different disease outcomes. Accordingly, a reduction of one case in heart  
283 diseases, strokes, diabetes, and cancers was assigned a value of 0.16, 0.18, 0.11, and 0.16 of a  
284 QALY respectively. Respiratory disease (asthma) was not part of the DSHC model and thus  
285 had not previously been given a health-related quality of life value. We therefore gave it the  
286 lowest value in the existent range (0.11 of a QALY). The value assigned to each disease was  
287 multiplied by the number of annual reduced cases of that disease in order to provide the  
288 number of QALYs resulting from changes in disease outcomes.

289 Changes in QALYs can be converted into monetised QALYs using a representation of how  
290 much society values a QALY. This model assumes the monetary value for a QALY to be  
291 £25,000 [26]. Therefore, the change in QALYs was multiplied by £25,000 to produce the  
292 monetised QALY from the implementation of the salt and sugar tax. However, monetary  
293 values occurring in the future need to be discounted in order to reflect both pure time  
294 preference (a preference for something to come at one point in time rather than another  
295 merely because of when it occurs in time), and the diminished marginal utility of income (the  
296 change in human satisfaction resulting from an increase or decrease in an individual's

297 income). These are combined with the assumption that real incomes rise over time. Hence,  
298 similar to the DHSC model and that recommended by the UK Treasury [27], a discount rate  
299 of 1.5% to total monetary gains was applied as a cumulative multiplier to model outputs.

300

## 301 **Results**

### 302 *Health impacts and associated monetary gains*

303 The results of the health impact modelling show that average life expectancy in the UK could  
304 increase by up to 4.9 months if there was both a high manufacturer and high consumer  
305 response to the proposed tax on salt and sugar (Table 4). Even with a minimal response from  
306 both manufacturers and consumers, the estimated gain in life expectancy would be 1.7  
307 months. Total YLG accumulated over 25 years from avoided deaths ranged from 1.2 million  
308 in the Low-Low scenario to 3.5 million in the High-High scenario, with similar numbers of  
309 QALYs being accumulated through reduced morbidity. The largest reductions in new cases of  
310 disease came from cardiovascular disease, followed by type 2 diabetes, with smaller  
311 reductions in cancers and respiratory disease. The associated monetary gains ranged from  
312 £27-£78 billion depending on the scenario.

313



314 **Table 4.** Results from life table modelling based on mortality and morbidity, combining  
 315 health impacts from both reduced salt and sugar consumption.  
 316

| Outputs                                                      | Low-Low   | High-No   | High-Moderate | High-High  |
|--------------------------------------------------------------|-----------|-----------|---------------|------------|
| Changes in life expectancy in months <sup>a</sup>            | 1.7       | 3.6       | 4.5           | 4.9        |
| Total YLG accumulated over 25 years <sup>a</sup>             | 1 185 716 | 2 561 406 | 3 229 968     | 3 452 691  |
| Reduction in cases of disease over 25 years                  |           |           |               |            |
| Cardiovascular disease <sup>b</sup>                          | -348 887  | -742 739  | -942 611      | -1 012 056 |
| Diabetes                                                     | -208 093  | -374 105  | -523 513      | -571 310   |
| Cancers                                                      | -4 271    | -6 837    | -10 459       | -11 812    |
| Respiratory disease                                          | -90 605   | -165 521  | -230 354      | -249 126   |
| Total QALYs accumulated over 25 years <sup>c</sup>           | 1 276 467 | 2 743 742 | 3 469 136     | 3 710 765  |
| Total associated monetary gain (£, in billions) <sup>d</sup> | 26.8      | 57.6      | 72.8          | 77.9       |

317

318 <sup>a</sup>Based on changes in mortality.

319 <sup>b</sup>IHD, ischemic stroke, intracerebral/subarachnoid haemorrhage, hypertensive heart disease, atrial fibrillation and flutter.

320 <sup>c</sup>Based on changes in both mortality and morbidity.

321 <sup>d</sup>Based on both changes in mortality and morbidity, and on an estimated total saving of £25,000 per QALY with a 1.5%  
 322 discount rate [26].

323

324 Differences in YLG between the four scenarios show that the High-Moderate and High-High  
 325 scenarios are relatively similar in terms of mortality impacts, and that even the scenario  
 326 assuming no consumer response to the taxes would achieve around 75% of the benefit of the  
 327 High-High scenario that assumes a high degree of consumer response (**Figure 2**). The Low-  
 328 Low scenario assuming a low degree of manufacturer as well as consumer response would  
 329 achieve less than half of the benefits of the other scenarios. The 95% CI for the health and  
 330 economic impacts are displayed in **Supplementary Table 2**.

331

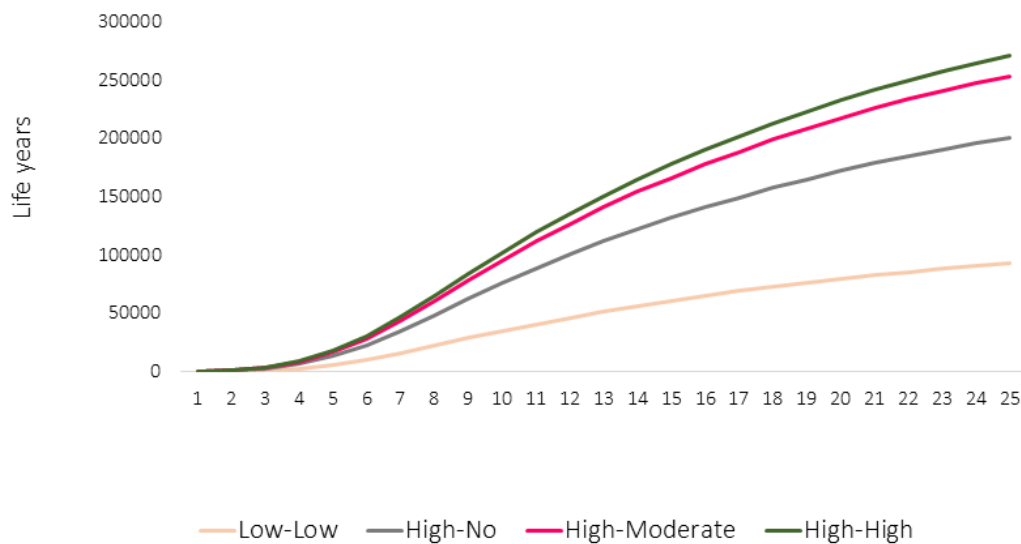

332

333 **Figure 2.** Years of life gained each year up to year 25 for the four modelled scenarios.

334 Slightly over half of the gains in YLG (48-54% depending on the scenario) can be attributed  
 335 to the reduction in sugar consumption (both direct and indirect pathways) and more than half  
 336 of those impacts can be ascribed to a reduced BMI in the UK population (**Figure 3**) with the  
 337 remainder accruing from direct impacts of sugar consumption on YLG.

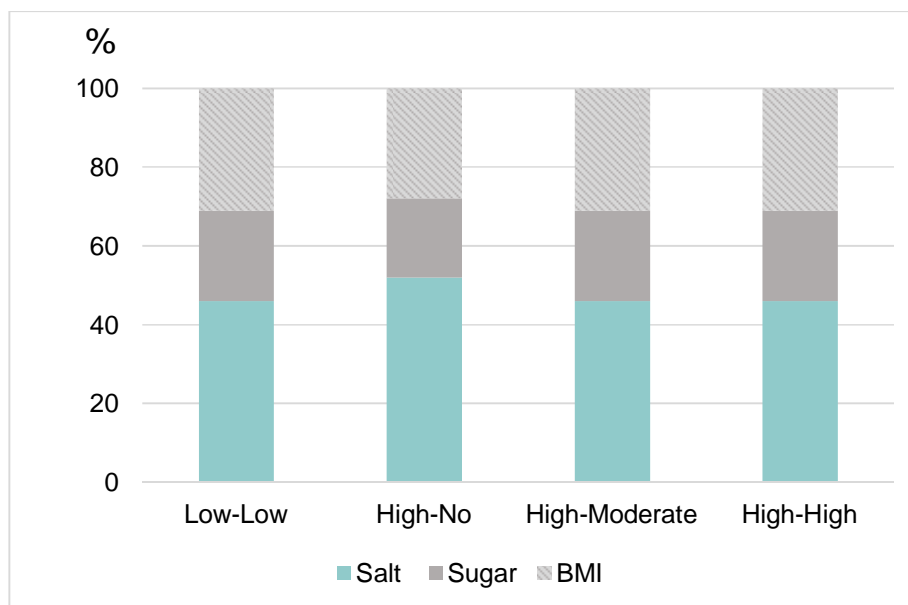

338

339 **Figure 3.** Share (%) of years of life gained attributed to each risk factor.

340

## 341 **Discussion**

342 The results of this modelling show that extending the current soft drinks levy to other foods  
343 high in sugar and adding a tax on salt could lead to significant health and economic benefits  
344 for the UK. Life expectancy in the UK could be increased by between 1.7 months and nearly  
345 5 months, depending on the degree of industry and consumer response to the tax. In the best-  
346 case scenario, with a high response from both consumers and industry, the total number of  
347 preventable cases of chronic disease could be reduced almost 2 million over 25 years,  
348 including reductions in CVD, type 2 diabetes, respiratory disease and cancer. In addition,  
349 economic benefits for society of approximately £27 to £78 billion from avoided ill-health  
350 could be achieved by introducing the proposed tax. The main part of these gains can be  
351 attributed to reduced mortality and morbidity from cardiovascular diseases, which remain the  
352 commonest causes of death and disability in the UK and are strongly associated with  
353 consumption of salt and sugar.

354 Our results show that a 29 and 27 percent reduction in sugar intake resulting from the tax  
355 among males and females, respectively, could reduce overweight and obesity by as much as  
356 10.9 and 10.5 percent in males and females, respectively. This is similar to other research  
357 where the prevalence of obesity was reported to reduce by 1.5 to 10 percent when added sugar  
358 intake reduced by 10 to 20 percent [28, 29]. Our results are also consistent with previous  
359 modelling studies showing improved health outcomes from diets that better align with dietary  
360 recommendations [30–32], and tally with the findings of previous modelling studies that have  
361 shown both health and economic gains resulting from a reduced intake of added sugars  
362 specifically [33–35]. Health and economic gains have also been reported as a result of the  
363 taxation of salt or foods high in salt in other countries [36–39]. For example, taxation of  
364 sodium in the United States has been estimated to potentially reduce sodium intake by 9.5%  
365 in the population, and could avert nearly a million cardiovascular events over the lifetime of

366 adults aged 40 to 85, increasing QALYs by 2.1 million [37]. Our findings add to this previous  
367 body of research, and thus reinforce arguments for why currently high intakes of salt and  
368 sugar should be targeted using fiscal policies.

369 To the best of our knowledge, this is the first study to explore the health effects of the salt and  
370 sugar tax proposed by the NFS. This analysis brings together different methods and data  
371 sources to explore co-benefits of various pathways of reduced salt and sugar consumption. An  
372 important strength is the ability to assess both direct and indirect pathways through which  
373 these consumption changes would lead to changes across time and dimensions of health and  
374 cost. Compared to looking at indirect vs. direct pathways in isolation, these analyses are  
375 therefore likely to capture a more complete picture of the possible health and economic  
376 benefits of fiscal measures that reduce intakes of salt and of added sugars. UK dietary  
377 recommendations (the Eatwell Guide) recommend that adults limit intakes of salt and added  
378 sugars to no more than 6g/d and 30g/d, respectively [5]. Given the UK current average  
379 consumption being considerably higher than that, our modelled scenarios, leading to  
380 reductions of up to 10% in salt and 29% in sugar, while ambitious, are metabolically rational  
381 and concordant with governmental goals.

382 A limitation to our modelling is that we made no assumptions about possible dietary  
383 substitution in our analyses, although removal of salt and added sugars in the diet could result  
384 in subsequent substitution of other foods that are instead high in e.g. saturated fats to maintain  
385 caloric balance. Our analysis could therefore have over- or under-estimated the health gains.

386 To date, evidence from intervention and modelling studies concerning what happens to  
387 consumption of other foods if intakes of salty and sugary foods reduce is sparse. However,  
388 recent analyses of food consumption trends in the UK show that intakes of sugar have  
389 declined while intakes of fruits, and vegetables in particular, have increased over the last 40  
390 years [40]. Furthermore, several studies indicate that fruit consumption can replace

391 consumption of sweet snacks [41, 42]. Therefore, our models are more likely to have  
392 underestimated the health impacts of the proposed tax due to substitution with healthy foods  
393 as opposed to overestimating them due to substitution with other unhealthy foods. Measures  
394 such as subsidies to reduce the cost of fruits and vegetables could be combined with a salt and  
395 sugar tax to facilitate and encourage health-promoting substitutions. In fact, previous studies  
396 that explored the combined effects of taxes for unhealthy foods/food components with  
397 subsidies (vs. taxes only) reported larger health benefits [36, 38, 43]. Combining taxes with  
398 subsidies would also help avoid constraining the resources of the lowest-income households  
399 that already dedicate >15% of total budgets to food purchases [44]. The funds raised by the  
400 tax could be spent on complementary measures addressing current inequalities around food,  
401 such as e.g., an expansion of the free school meal scheme, public health initiatives, and  
402 subsidisation of, and increasing access to, health promoting foods.

403 Despite being adjusted for age, sex, smoking, and physical activity, using RRs in our  
404 modelling of health impacts is a limitation because of the possibility for residual confounding.  
405 In our case, we applied 95% CIs for the RRs to provide a measure of variation in the selected  
406 health outcomes, but these may overestimate the CI widths due to aggregation across disease  
407 endpoints. There are also uncertainties related to the survey data used to develop the  
408 scenarios. These data are based on purchases and do thus not necessarily accurately capture  
409 people's actual consumption. Moreover, we only modelled the adult population. Considering  
410 the rise in childhood obesity in the UK [45], it is likely that the inclusion of children with  
411 type-2 diabetes would have generated additional health benefits. Our model also does not take  
412 into consideration the effects of socioeconomic status or ethnic origin. Because dietary  
413 patterns and disease burdens vary across sociodemographic/economic groups in the UK [46],  
414 this could have influenced our final outputs.

415 This study highlights the significant health and economic benefits that could be achieved by a  
416 fiscal measure that reduces consumption of salt and added sugars in UK adults. Despite the  
417 potential benefits, food taxes are complex and sometimes controversial, and it is important to  
418 consider potential barriers to implementation/effective implementation of any proposed tax.  
419 For example, a sugar tax may lead manufacturers to substitute fat for sugar which may have  
420 negative consequences for health. Furthermore, industry acceptability is likely to be crucial  
421 for avoiding increased costs to consumers, especially to low-income families. Combining  
422 taxes with subsidies could be a way to help avoid business losses and thus increase industry  
423 acceptability [47]. Equally important is consumer acceptability. Previous research shows that  
424 taxes are generally unpopular and seen as intrusive [48, 49]. However, it is promising that  
425 substantial public support seems to exist in the UK for an extension of the SDIL to other food  
426 categories [9]. Lastly, the success of the proposed tax is also likely to depend on the degree of  
427 the management, accountability and public resources available to enable its implementation  
428 [50].

## 429 **Conclusions**

430 By investigating the effects of a combined salt and sugar tax applied to a wide range of food  
431 categories, and through a range of different plausible scenarios of manufacturer and consumer  
432 response, our work adds new evidence to support the introduction of targeted fiscal measures  
433 to reduce both salt and sugar consumption in the UK. These benefit estimates are not  
434 definitive and carry significant uncertainty. Nevertheless, they should help determine the  
435 order of magnitude of health benefits that might be expected, and thus lend important weight  
436 to support health policy makers in their review of options to implement salt and sugar  
437 reduction.

438

439 **Acknowledgements:** We would like to thank Hannah Brinsden and Ria Saha at the Food  
440 Foundation for their important contributions to designing this research. PEC designed and  
441 conducted the research, analysed the data, wrote the paper, and had primary responsibility for  
442 the final content. JM designed the research, provided essential materials and wrote the paper.  
443 SP designed the research, provided essential materials and wrote the paper. RG designed and  
444 conducted the research, wrote the paper and maintained study oversight. All authors have read  
445 and approved the final manuscript.

446 **Data Availability:** Data described in the manuscript, code book, and analytic code will be  
447 made available upon request pending application and approval.

448 **Author disclosures:** All authors report no conflicts of interest.

## 449 **References**

450

- 451 1. Afshin A, Sur PJ, Fay KA, et al (2019) Health effects of dietary risks in 195 countries,  
452 1990–2017: a systematic analysis for the Global Burden of Disease Study 2017. The  
453 Lancet. [https://doi.org/10.1016/S0140-6736\(19\)30041-8](https://doi.org/10.1016/S0140-6736(19)30041-8)
- 454 2. Janssen F, Bardoutsos A, Vidra N (2020) Obesity Prevalence in the Long-Term Future  
455 in 18 European Countries and in the USA. *Obes Facts* 13:514–527
- 456 3. Hofmarcher T, Lindgren P, Wilking N, Jönsson B (2020) The cost of cancer in Europe  
457 2018. *Eur J Cancer* 129:41–49
- 458 4. NDNS: time trend and income analyses for Years 1 to 9 (2019). Public Health England
- 459 5. Buttriss JL (2016) The Eatwell Guide refreshed. *Nutr Bull* 41:135–141

- 460 6. O’Riordan T, Stoll-Kleemann S (2015) The Challenges of Changing Dietary Behavior  
461 Toward More Sustainable Consumption. *Environ Sci Policy Sustain Dev* 57:4–13
- 462 7. Scarborough P, Adhikari V, Harrington RA, Elhussein A, Briggs A, Rayner M, Adams  
463 J, Cummins S, Penney T, White M (2020) Impact of the announcement and  
464 implementation of the UK Soft Drinks Industry Levy on sugar content, price, product  
465 size and number of available soft drinks in the UK, 2015-19: A controlled interrupted  
466 time series analysis. *PLOS Med* 17:e1003025
- 467 8. Sugar reduction programme: industry progress 2015 to 2020. In: GOV.UK.  
468 [https://www.gov.uk/government/publications/sugar-reduction-programme-industry-](https://www.gov.uk/government/publications/sugar-reduction-programme-industry-progress-2015-to-2020)  
469 [progress-2015-to-2020](https://www.gov.uk/government/publications/sugar-reduction-programme-industry-progress-2015-to-2020). Accessed 11 Sep 2023
- 470 9. Obesity polls & surveys | YouGov.  
471 [https://d3nkl3psvxxpe9.cloudfront.net/documents/ObesityHealthAlliance\\_Results\\_2305](https://d3nkl3psvxxpe9.cloudfront.net/documents/ObesityHealthAlliance_Results_230516_W.pdf)  
472 [16\\_W.pdf](https://d3nkl3psvxxpe9.cloudfront.net/documents/ObesityHealthAlliance_Results_230516_W.pdf). Accessed 19 Sep 2023
- 473 10. Dimbelby H (2021) The National Food Strategy: The Plan.
- 474 11. Griffith R, Jenneson V, James J, Taylor A (2021) The impact of a tax on added sugar  
475 and salt. Institute for Fiscal Studies, UKRI - Economic and Social Research Council
- 476 12. Department of Health and Social Care (DHSC) Calorie Model (2018). Global and Public  
477 Health Group/ Obesity Branch/Childhood Obesity Team/10800
- 478 13. Public Health England (2017) Sugar Reduction: Achieving the 20% A technical report  
479 outlining progress to date, guidelines for industry, 2015 baseline levels in key foods and  
480 next steps.
- 481 14. Public Health England (2020) Salt reduction targets for 2024.



- 482 15. Vos T, Lim SS, Abbafati C, et al (2020) Global burden of 369 diseases and injuries in  
483 204 countries and territories, 1990–2019: a systematic analysis for the Global Burden of  
484 Disease Study 2019. *The Lancet* 396:1204–1222
- 485 16. Hendriksen MAH, van Raaij JMA, Geleijnse JM, Breda J, Boshuizen HC (2015) Health  
486 Gain by Salt Reduction in Europe: A Modelling Study. *PLOS ONE* 10:e0118873
- 487 17. Stanhope KL (2016) Sugar consumption, metabolic disease and obesity: The state of the  
488 controversy. *Crit Rev Clin Lab Sci* 53:52–67
- 489 18. Hall KD, Sacks G, Chandramohan D, Chow CC, Wang YC, Gortmaker SL, Swinburn  
490 BA (2011) Quantification of the effect of energy imbalance on bodyweight. *The Lancet*  
491 378:826–837
- 492 19. Milner J, Green R, Dangour AD, Haines A, Chalabi Z, Spadaro J, Markandya A,  
493 Wilkinson P (2015) Health effects of adopting low greenhouse gas emission diets in the  
494 UK. *BMJ Open* 5:e007364
- 495 20. Miller BG (2003) Life table methods for quantitative impact assessments in chronic  
496 mortality. *J Epidemiol Community Health* 57:200–206
- 497 21. R Core Team (2021) R: A language and environment for statistical computing.
- 498 22. Nomis - Official Labour Market Statistics - Nomis - Official Labour Market Statistics.  
499 [https://www.nomisweb.co.uk/query/construct/summary.asp?mode=construct&version=0](https://www.nomisweb.co.uk/query/construct/summary.asp?mode=construct&version=0&dataset=2002)  
500 &dataset=2002. Accessed 18 Apr 2020
- 501 23. GBD Results Tool | GHDx. <http://ghdx.healthdata.org/gbd-results-tool>. Accessed 18 Apr  
502 2020

- 503 24. Bandy LK, Scarborough P, Harrington RA, Rayner M, Jebb SA (2020) Reductions in  
504 sugar sales from soft drinks in the UK from 2015 to 2018. *BMC Med* 18:20
- 505 25. Public Health England (2018) Guidance: Economic evaluation.  
506 [https://www.gov.uk/government/publications/evaluation-in-health-and-well-being-](https://www.gov.uk/government/publications/evaluation-in-health-and-well-being-overview/economic-evaluation)  
507 [overview/economic-evaluation](https://www.gov.uk/government/publications/evaluation-in-health-and-well-being-overview/economic-evaluation). Accessed 10 Jun 2021
- 508 26. Methods for the development of NICE public health guidance, Third edition (2012).  
509 National Institute for Health and Care Excellence, London
- 510 27. HM Treasury (2018) HM Treasury. The green book: central government advice on  
511 appraisal and evaluation.
- 512 28. Mytton OT, Eyles H, Ogilvie D (2014) Evaluating the Health Impacts of Food and  
513 Beverage Taxes. *Curr Obes Rep* 3:432–439
- 514 29. Wang YC, Coxson P, Shen Y-M, Goldman L, Bibbins-Domingo K (2012) A Penny-Per-  
515 Ounce Tax On Sugar-Sweetened Beverages Would Cut Health And Cost Burdens Of  
516 Diabetes. *Health Aff (Millwood)* 31:199–207
- 517 30. Eustachio Colombo P, Milner J, Scheelbeek PF, Taylor A, Parlesak A, Kastner T,  
518 Nicholas O, Elinder LS, Dangour AD, Green R (2021) Pathways to “5-a-day”: modeling  
519 the health impacts and environmental footprints of meeting the target for fruit and  
520 vegetable intake in the United Kingdom. *Am J Clin Nutr* 114:530–539
- 521 31. Scheelbeek P, Green R, Papier K, Knuppel A, Alae-Carew C, Balkwill A, Key TJ, Beral  
522 V, Dangour AD (2020) Health impacts and environmental footprints of diets that meet  
523 the Eatwell Guide recommendations: analyses of multiple UK studies. *BMJ Open*  
524 10:e037554

- 525 32. Patterson E, Eustachio Colombo P, Milner J, Green R, Elinder LS (2021) Potential  
526 health impact of increasing adoption of sustainable dietary practices in Sweden. *BMC*  
527 *Public Health* 21:1332
- 528 33. Basu S, Lewis K (2014) Reducing Added Sugars in the Food Supply Through a Cap-  
529 and-Trade Approach. *Am J Public Health* 104:2432–2438
- 530 34. Mekonnen TA, Odden MC, Coxson PG, Guzman D, Lightwood J, Wang YC, Bibbins-  
531 Domingo K (2013) Health Benefits of Reducing Sugar-Sweetened Beverage Intake in  
532 High Risk Populations of California: Results from the Cardiovascular Disease (CVD)  
533 Policy Model. *PLoS ONE* 8:e81723
- 534 35. Vreman RA, Goodell AJ, Rodriguez LA, Porco TC, Lustig RH, Kahn JG (2017) Health  
535 and economic benefits of reducing sugar intake in the USA, including effects via non-  
536 alcoholic fatty liver disease: a microsimulation model. *BMJ Open* 7:e013543
- 537 36. Cobiac LJ, Scarborough P (2019) Modelling the health co-benefits of sustainable diets in  
538 the UK, France, Finland, Italy and Sweden. *Eur J Clin Nutr* 73:624–633
- 539 37. Smith-Spangler CM (2010) Population Strategies to Decrease Sodium Intake and the  
540 Burden of Cardiovascular Disease: A Cost-Effectiveness Analysis. *Ann Intern Med*  
541 152:481
- 542 38. Ni Mhurchu C, Eyles H, Genc M, Scarborough P, Rayner M, Mizdrak A, Nnoaham K,  
543 Blakely T (2015) Effects of Health-Related Food Taxes and Subsidies on Mortality from  
544 Diet-Related Disease in New Zealand: An Econometric-Epidemiologic Modelling Study.  
545 *PLOS ONE* 10:e0128477

- 546 39. Nghiem N, Blakely T, Cobiac LJ, Pearson AL, Wilson N (2015) Health and Economic  
547 Impacts of Eight Different Dietary Salt Reduction Interventions. PLOS ONE  
548 10:e0123915
- 549 40. Bentham J, Singh GM, Danaei G, et al (2020) Multidimensional characterization of  
550 global food supply from 1961 to 2013. Nat Food 1:70–75
- 551 41. Alinia S, Lassen AD, Krogholm KS, Christensen T, Hels OH, Tetens I (2011) A  
552 workplace feasibility study of the effect of a minimal fruit intervention on fruit intake.  
553 Public Health Nutr 14:1382–1387
- 554 42. Toft U, Winkler LL, Mikkelsen BE, Bloch P, Glümer C (2017) Discounts on fruit and  
555 vegetables combined with a space management intervention increased sales in  
556 supermarkets. Eur J Clin Nutr 71:476–480
- 557 43. Nnoaham KE, Sacks G, Rayner M, Mytton O, Gray A (2009) Modelling income group  
558 differences in the health and economic impacts of targeted food taxes and subsidies. Int J  
559 Epidemiol 38:1324–1333
- 560 44. Family Food 2017/18. In: GOV.UK.  
561 <https://www.gov.uk/government/publications/family-food-201718/family-food-201718>.  
562 Accessed 23 Jul 2020
- 563 45. Significant increase in obesity rates among primary-aged children, latest statistics show.  
564 In: NHS Digit. [https://digital.nhs.uk/news/2021/significant-increase-in-obesity-rates-](https://digital.nhs.uk/news/2021/significant-increase-in-obesity-rates-among-primary-aged-children-latest-statistics-show)  
565 [among-primary-aged-children-latest-statistics-show](https://digital.nhs.uk/news/2021/significant-increase-in-obesity-rates-among-primary-aged-children-latest-statistics-show). Accessed 27 Sep 2023

- 566 46. Health Disparities White Paper | London City Hall. [https://www.london.gov.uk/who-we-](https://www.london.gov.uk/who-we-are/what-london-assembly-does/questions-mayor/find-an-answer/health-disparities-white-paper)  
567 [are/what-london-assembly-does/questions-mayor/find-an-answer/health-disparities-](https://www.london.gov.uk/who-we-are/what-london-assembly-does/questions-mayor/find-an-answer/health-disparities-white-paper)  
568 [white-paper](https://www.london.gov.uk/who-we-are/what-london-assembly-does/questions-mayor/find-an-answer/health-disparities-white-paper). Accessed 11 Sep 2023
- 569 47. Gillison F, Grey E, Verplanken B, Barnett J, Baber F (2022) A rapid review of the  
570 acceptability and impact of approaches to reduce the salt, fat and sugar content of  
571 people’s diets on consumers and industry. <https://doi.org/10.46756/sci.fsa.ljo674>
- 572 48. Frieden TR (2013) Government’s Role in Protecting Health and Safety. *N Engl J Med*  
573 368:1857–1859
- 574 49. Haggmann D, Siegrist M, Hartmann C (2018) Taxes, labels, or nudges? Public acceptance  
575 of various interventions designed to reduce sugar intake. *Food Policy* 79:156–165
- 576 50. UK Health Forum (2018) Public health and the food and drinks industry: The  
577 governance and ethics of interaction. Lessons from research, policy and practice.
- 578
- 579
- 580
- 581
