# Population health impacts and associated monetary gains from the taxation of salt and sugar in the United Kingdom

Patricia Eustachio Colombo<sup>1,2</sup>, James Milner<sup>1</sup>, Silvia Pastorino<sup>1</sup>, Hannah Brinsden<sup>3</sup>, Ria Saha<sup>3</sup>, Rosemary Green<sup>1</sup>

<sup>1</sup>Centre on Climate Change and Planetary Health, London School of Hygiene and Tropical Medicine, London, UK

<sup>2</sup>Department of Biosciences and Nutrition, Karolinska Institutet, Stockholm, Sweden

<sup>3</sup>The Food Foundation, SW1P 2PD London, United Kingdom

## Abstract

Poor diets contribute to significantly and increasingly to the burden of chronic diseases in the United Kingdom, impacting both health and the economy. The introduction of fiscal measures that target unhealthy foods could provide a near-unique opportunity to shifting diets at scale for the benefit of both social and economic sustainability. This study estimates the expected health and economic benefits from the reduction in consumption of salt and sugar for four scenarios, each reflecting different manufacturer and consumer responses to a proposed tax on salt and sugar. The results of this modelling show that life expectancy in the UK could be increased by between 1.7 months and nearly 5 months, depending on the degree of industry and consumer response to the tax. The tax could also lead to almost 2 million fewer cases of preventable chronic diseases over 25 years. In addition, economic benefits of approximately £27 to £78 billion from avoided ill-health could be achieved by introducing the proposed tax. The main part of these gains can be attributed to reduced mortality and morbidity from cardiovascular diseases. Our modelling show that significant benefits to both population health and the economy could be expected from the taxation of foods high in salt and sugar. The proposed dietary changes are likely to be insufficient to reach national public health targets; hence, additional measures to reduce the burden of chronic disease in the UK are equally critical to consider.

**NOTE: This preprint reports new research that has not been certified by peer review and should not be used to guide clinical practice.**

## Abbreviations

|             |                                      |
|-------------|--------------------------------------|
| <b>AF</b>   | Atrial Fibrillation                  |
| <b>BMI</b>  | Body mass index                      |
| <b>DHSC</b> | Department of Health and Social Care |
| <b>GBD</b>  | Global Burden of Disease             |
| <b>IHD</b>  | Ischemic heart disease               |
| <b>NFS</b>  | National Food Strategy               |
| <b>QALY</b> | Quality Adjusted Life Year           |
| <b>RR</b>   | Relative Risk                        |
| <b>SDIL</b> | Sugary drinks industry levy          |
| <b>SSB</b>  | Sugar sweetened beverages            |
| <b>YLG</b>  | Years of Life Gained                 |
| <b>YLL</b>  | Years of Life Lost                   |

## Introduction

Poor diet contributes to an estimated 90,000 deaths every year in the UK [1]. More than half of over-45s are living with health conditions for which diet is a widely accepted/recognised contributing risk factor, including cardiovascular disease, type-2 diabetes, and obesity. As things stand, obesity is expected to continue increasing [2]. By 2035, type 2 diabetes is projected to cost the NHS £15 billion a year, or one and a half times as much as cancer does today [3]. Halting this trajectory, through the introduction of fiscal measures or other interventions to change diets, is the single biggest thing we can do to protect the future of our health service.

In 2021, the National Food Strategy: The Plan [4] suggested that the UK Government should introduce a £3/kg tax on sugar and a £6/kg tax on salt sold for use in processed foods or in restaurants and catering businesses. The report argued that this would generate an incentive for manufacturers to lower the sugar and salt content of their products, through reformulation of recipes or by reduction of portion sizes.

This study estimates the expected health benefits from the reduction in consumption of salt and sugar, and the associated reduction in calories, for four scenarios developed through previous work by the Institute for Fiscal Studies [5], based on the proposed tax [4], each reflecting different manufacturer and consumer responses to a proposed extension of the sugary drinks industry levy (SDIL) to foods high in sugar and/or salt. We also quantify the potential economic impacts resulting from changes in salt and sugar consumption.

## Material and methods

### *Scenarios*

In this work, we have adopted a methodology that has combined elements of the Department of Health and Social Care (DHSC) calorie model [6] (i.e. the calculation of changes in body-mass index (BMI) across the population due to a hypothetical reduction in energy intake from sugar) with life table modelling quantifying health benefits from a reduced intake of sugar and salt. Four different scenarios based on previous work from the Institute of Fiscal Studies [5] for the National Food Strategy: The Plan [4] were tested, each reflecting different manufacturer and consumer responses to a proposed tax:

1. The “**Low-Low**” scenario: Low industry change (firms reformulate to 30% of PHE targets), and low consumer change (they substitute away from products by one third of the price increase)
2. The “**High-No**” scenario: High industry change (full reformulation to PHE targets), but no consumer change (they do not respond to price increases)
3. The “**High-Moderate**” scenario: High industry change (full reformulation to PHE targets), and moderate consumer change (they substitute away from products by 70% of the price increase)
4. The “**High-High**” scenario: High industry change (full reformulation to PHE targets), and high consumer change (they substitute away from products by the same amount as the price increase)

Changes in the intake of salt and sugar across the adult population in the UK, resulting from these four scenarios, have been quantified previously [5]. Briefly, consumption data from the Kantar Fast Moving Consumer Goods (FMCG) Purchase Panel (Take Home) 2019 and Kantar Out of Home Purchase Panel

2016-2019 data were used to estimate changes in intakes based on the four described scenarios (with varying degrees of reformulation and price elasticities) (Table 1).

**Table 1.** Scenarios tested, based on previous work by the Institute for Fiscal Studies [5].

|       | Low-Low Scenario           | High-No Scenario           | High-Moderate Scenario     | High-High Scenario         |
|-------|----------------------------|----------------------------|----------------------------|----------------------------|
|       | Change/day (males/females) | Change/day (males/females) | Change/day (males/females) | Change/day (males/females) |
| Salt  | -0.3/-0.2 g                | -0.7/-0.6 g                | -0.8/-0.7 g                | -0.9/-0.7 g                |
| Sugar | -5.3/-4.5 g                | -9.7/8.3g                  | -13.6/11.4 g               | -15.0/12.6 g               |

Changes in salt consumption were hypothesised to impact health outcomes directly (stomach cancer, [7]) and indirectly (ischemic heart disease (IHD) and stroke, [8]). Changes in sugar consumption were hypothesised to impact health outcomes both directly (IHD,[7, 9]), and indirectly (through BMI [9]). Hence, like the DHSC model, our model also considered health impacts from changes in BMI resulting from a decreased intake of calories from sugar (Figure 1).

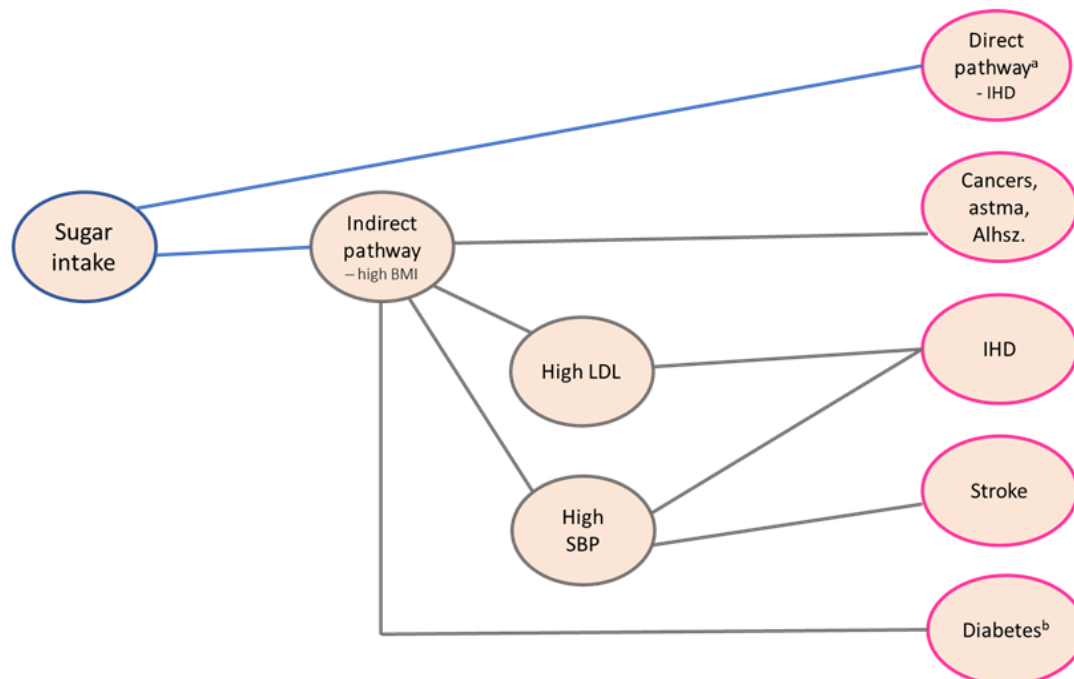

**Figure 1.** Pathways through which sugar intake affects disease outcomes directly and indirectly.

<sup>a</sup>Unregulated hepatic fructose metabolism leading to hepatic de novo lipogenesis which in turn promotes very low-density lipoprotein production [9]. <sup>b</sup>High fasting glucose levels from insulin resistance due to high free fatty acid levels (and the predominant utilisation of lipids by muscle and skeleton) leading to hyperinsulinemia and ultimately also impaired insulin secretion [9]. BMI, body-mass index; SBP, systolic blood pressure; LDL, low density lipoprotein; IHD, ischemic heart disease.

All the scenarios used the following input parameters for the health benefit modelling:

- Policy lifetime and evaluation period = 25 years. The levy is active for 25 years, thus the health-related economic impacts of the levy are also evaluated over 25 years. This timeline was chosen to mirror that used for the National Food Strategy: The Plan [4], but also because this is long enough to show significant health benefits from the policies in question. However, benefits are likely to continue to rise beyond 25 years, so the net present value of these policies would increase further as more years are added to the model.
- The health impacts are quantified for the entire adult population in the UK.
- Scenarios have age and gender specific calorie reductions, based on previous work by the Institute for Fiscal Studies [5] and given in Table 2.

The primary outcomes of the modelling were: i) Changes in life expectancy and Years of Life Gained (YLG) from reduced mortality accumulated over 25 years, ii) Changes in morbidity (new cases of different diseases) accumulated over 25 years, iii) Changes in Quality Adjusted Life Years (QALYs) from changes in YLG and morbidity over 25 years, and iv) Associated monetary gain (£) of the changes in QALYs.

### *Quantifying reductions in kcal and BMI*

In accordance with the DHSC calorie model, 1 gram of reduced sugar intake was translated to 4 kcal reduced energy intake from sugar, which in turn was assumed to correspond to a 0.042kg reduction in body weight [10]. Based on the four scenarios, and these assumptions, the energy intake from sugar was translated to a change in body weight ranging from -0.76 to -2.12kg in men, and -0.89 to -2.52kg for women (Table 2).

**Table 2.** Scenario specific reductions in calories as well as corresponding reductions in body weight grouped by gender.

| Scenario           | kcal  | Weight reduction (kg) <sup>a</sup> |
|--------------------|-------|------------------------------------|
| <b>Males 18+</b>   |       |                                    |
| Low-Low            | -21.2 | -0.89                              |
| High-No            | -38.8 | -1.63                              |
| High-Moderate      | -54.4 | -2.28                              |
| High-High          | -60   | -2.52                              |
| <b>Females 18+</b> |       |                                    |
| Low-Low            | -18   | -0.76                              |
| High-No            | -33.2 | -1.39                              |
| High-Moderate      | -45.6 | -1.92                              |
| High-High          | -50.4 | -2.12                              |

<sup>a</sup>Assuming that 0.042 kg body weight is lost per calorie reduction [10].

The National Diet and Nutrition Survey 2019 [11] was used to provide a nationally representative cohort to which changes in body weight (and BMI) were applied. Each adult in the survey cohort was first assigned their (baseline) BMI based on their height and weight. Similar to the DHSC approach, new body weights (and thus new BMIs) resulting from a reduced energy intake from sugar were calculated for adults considered overweight (defined as BMI  $\geq$  25 kg/m<sup>2</sup>) only. The average BMI of the entire

baseline adult population was then compared to the average BMI of the adult population after modifications to weights/BMIs were computed. The difference between the average BMI of the total adult population at baseline and the average BMI of the total adult population when the BMI of overweight/obese adults was changed (Table 3), were used as inputs in the life table model. BMI changes ranged from -0.17 to -0.48 amongst men and -0.19 to -0.53 amongst women. Changes in the distribution of BMI across the adult population in the UK after the reduced consumption in sugar are displayed in Figure 2. The prevalence of overweight and obesity dropped by 10.9 and 10.5 percent among males and females, respectively (no data shown).

**Table 3.** Changes in average adult body mass index resulting from a reduced energy intake from sugar.

| Scenario       | Average BMI baseline | Average BMI kcal reduction | BMI difference |
|----------------|----------------------|----------------------------|----------------|
| <b>Males</b>   |                      |                            |                |
| Low-Low        | 27.61                | 27.41                      | -0.20          |
| High-No        | 27.61                | 27.24                      | -0.37          |
| High-Moderate  | 27.61                | 27.09                      | -0.52          |
| High-High      | 27.61                | 27.04                      | -0.57          |
| <b>Females</b> |                      |                            |                |
| Low-Low        | 27.15                | 26.99                      | -0.16          |
| High-No        | 27.15                | 26.86                      | -0.29          |
| High-Moderate  | 27.15                | 26.75                      | -0.40          |
| High-High      | 27.15                | 26.71                      | -0.44          |

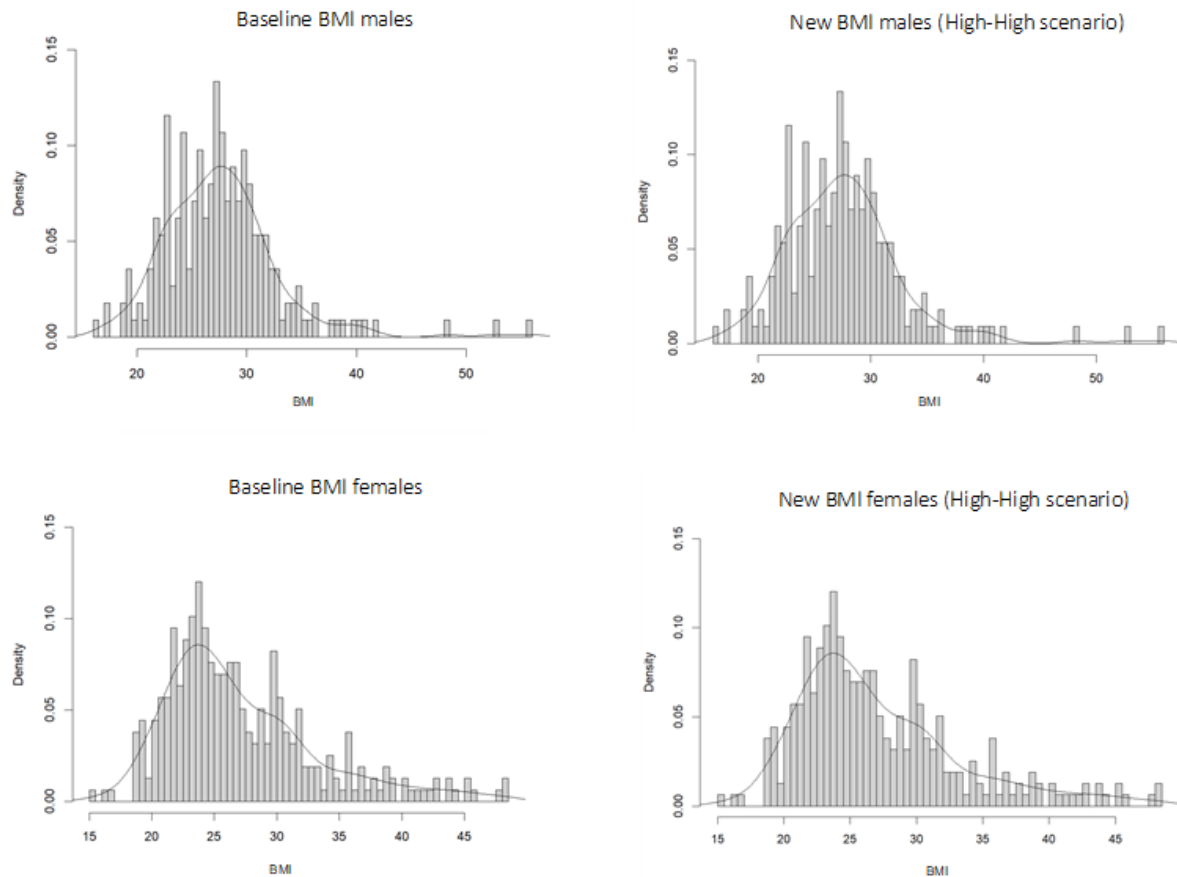

**Figure 2.** Distribution of body-mass index in the adult UK population at baseline and after weight-loss resulting from reduced sugar intake in the High-High scenario.

### *Disease outcomes and relative risks*

Dose-response relationships (i.e. relative risks) between dietary intake and mortality from chronic diseases were obtained from the latest Global Burden of Disease (GBD) study [7]. The relative risk (RR) for a dietary risk-disease pair, shows how much the risk of mortality (or morbidity) would change when the dietary risk changes. For example, the risk of IHD is reduced by 49% for each 6 g reduction in salt intake (Table 4). A total number of 24 disease outcomes (Table 4) were considered for the modelling as they have been shown to be linked to sugar/salt consumption and/or BMI [7].

The relative risks from the GBD which were expressed in terms of a harmful risk factor (e.g. “diet high in sodium/salt”) were inverted to create relative risks for a positive change in diet. The GBD provides relative risks for females and males combined, by 5-year age ranges, starting from the age of 25. The relative risks for each risk, outcome, and 5-year age range were weighted according to the age distribution in the UK population to create one single relative risk for each risk-outcome pair. Ages from 18-25 were assigned the same relative risk as the 25-29 age group, although the baseline mortality from the included dietary risks was almost non-existent in the UK population aged 18-25. The RRs for IHD-sugar and stomach cancer-salt were non-linear, i.e. different RRs were provided for different, pre-defined levels of risk. Therefore, monotonic cubic spline interpolation using the programme SRS splines, available as an add-in to Excel [12] was applied to get the RR reflecting the specific changes in salt and sugar intake as per the four scenarios.

### *Health impact modelling*

Health impacts were the main outcome of this study, and calculated on the basis of a previously applied methodology [13], using the life table model IOMLIFET [14], implemented in R [15]. Life tables were separately generated for males and females, due to their different underlying mortality and morbidity rates. The latest (2019) data on age-specific and sex-specific population-size estimates, and on age-specific and sex-specific all-cause mortality were obtained from the Office for National Statistics [16]. Data on disease-specific mortality were downloaded from the GBD results-tool [17]. These data were combined to create input data for the UK. The disease-specific mortality data were only available by 5-year age ranges and not in single-year-of-age format. Using the weighted mean age of the UK population in each interval, the rate for each 1-year age interval was interpolated using monotonic cubic spline interpolation [12].

Life table models were used to quantify changes in life expectancy and Years of Life Lost (YLL) from changes in dietary risk exposures according to the four different reformulation scenarios (Table 4). Briefly, the IOMLIFET model estimates survival patterns in the population over time based on age-specific mortality rates. Based on the information of a hypothetical change in diet (risk-exposure) and a known exposure-response function, changes in survival rates can be quantified as e.g., YLL or changes to life expectancy. YLL can be explained as the years of life lost for an individual (or a population) as a result of premature avertable mortality, considering the age at which deaths occurred. Since the dietary modifications were expected to reduce mortality rates, YLL were translated to years of life gained (YLG).

Changes in salt and sugar consumption were assumed to be adopted instantly while underlying mortality rates remained constant for the duration of follow-up. In cases where several dietary exposures affected the same disease, the risks were multiplied together as done previously [13]. Changes in YLG were quantified as the additional number of years of life that individuals in the UK adult population would live as a result of reducing their risk of dying prematurely from disease outcomes relating to salt and sugar consumption. Changes in morbidity (new cases of disease) were quantified using the same principles. Morbidity calculations were performed using the output population from the life table as the baseline population, to which changes in risk exposures were applied. Each morbidity calculation was performed separately. Changes in life expectancy at birth were calculated as the difference between baseline life expectancy (the expected life years divided by the starting population) and the impacted (modelled) life expectancy (the impacted expected life years divided by the impacted starting population).

Previous research assessing effects of dietary interventions on various causes of mortality has established approximate time lags between exposure and onset of disease (20). Hence, effects on ischemic heart disease, stroke and type 2 diabetes were assumed to reach a maximum impact after 10 years and for cancers after 30 years, with no change in cancer risk during the first 10 years. Time-varying functions based on cumulative distribution functions of normally distributed variables (s-shaped curves) were implemented to account for time lags between dietary changes and changes in health outcomes.



**Table 4.** Disease outcomes used for the modelling.

| Disease outcomes           | Dietary risk | Relative risk  | Change in units | Dose-response relationship |
|----------------------------|--------------|----------------|-----------------|----------------------------|
| IHD <sup>a</sup>           | Salt         | 0.510          | -6              | linear                     |
| IHD <sup>b</sup>           | Sugar        | 0.982 to 0.941 | -4.9 to -13.80  | non-linear                 |
| IHD                        | BMI          | 0.587          | -5              | linear                     |
| Ischemic stroke            | Salt         | 0.390          | -6              | linear                     |
| Ischemic stroke            | BMI          | 0.556          | -5              | linear                     |
| Stomach cancer             | Salt         | 0.976 to 0.924 | -0.25 to -0.80  | non-linear                 |
| Oesophageal cancer         | BMI          | 0.730          | -5              | linear                     |
| Colorectal cancer          | BMI          | 0.898          | -5              | linear                     |
| T2D                        | BMI          | 0.368          | -5              | linear                     |
| Gallbladder cancer         | BMI          | 0.804          | -5              | linear                     |
| Pancreatic cancer          | BMI          | 0.925          | -5              | linear                     |
| Breast cancer              | BMI          | 1.124          | -5              | linear                     |
| Uterine cancer             | BMI          | 0.628          | -5              | linear                     |
| Ovarian cancer             | BMI          | 0.976          | -5              | linear                     |
| Kidney cancer              | BMI          | 0.782          | -5              | linear                     |
| Thyroid cancer             | BMI          | 0.850          | -5              | linear                     |
| Multiple Myeloma           | BMI          | 0.917          | -5              | linear                     |
| Acute lymphoid leukaemia   | BMI          | 0.902          | -5              | linear                     |
| Chronic lymphoid leukaemia | BMI          | 0.902          | -5              | linear                     |
| Chronic myeloid leukaemia  | BMI          | 0.902          | -5              | linear                     |
| Other leukaemia            | BMI          | 0.902          | -5              | linear                     |
| Intracerebral haemorrhage  | BMI          | 0.470          | -5              | linear                     |
| Subarachnoid haemorrhage   | BMI          | 0.470          | -5              | linear                     |
| HHD                        | BMI          | 0.404          | -5              | linear                     |
| AF and flutter             | BMI          | 0.743          | -5              | linear                     |
| Asthma                     | BMI          | 0.712          | -5              | linear                     |
| Alzheimer                  | BMI          | 0.822          | -5              | linear                     |

<sup>a</sup>RRs for IHD and stroke were derived from previous research [8].

<sup>b</sup>RRs for sugar sweetened beverages (SSB) from GBD [7] were used as a basis for the sugar-IHD relationship. Data from previous research [18] was used to estimate the average sugar content/100 ml of the SSB consumed in the UK. The average sugar content/100 ml of High-sugar, Mid sugar and Low-sugar beverages was used to compute a weighted average sugar content/100 ml of SSB. This weighted average (=7.86 g/100ml) was used as a proxy for sugar intake and was thus applied to model the reduction of sugar.

### *Quality Adjusted Life Years and monetary gains*

Quality Adjusted Life Years (QALYs) are a measure of disease burden, and considers both the quality and quantity of life lived. Changes in QALYs were modelled by taking into account both changes in YLG from the introduction of a salt and sugar tax, as well as the reduction of disease cases.

The YLG from the health impact modelling were translated to QALYs based on the assumption that an increased duration of life of one year would result in a gain of one QALY [19]. To calculate QALYs based on changes in morbidity, we used a previously developed measure from the DHSC model [6] that represents the health-related quality of life that can be associated with different disease outcomes. Accordingly, a reduction of one case in heart diseases, strokes, diabetes, and cancers were assigned a value of 0.16, 0.18, 0.11, and 0.16 of a QALY respectively. Respiratory disease (asthma) was not part of the DSHC model and thus had not previously been given a health-related quality of life value. We therefore gave it the lowest value in the existent range (0.11 of a QALY). The value assigned to each disease was multiplied by the number of annual reduced cases of that disease in order to provide the number of QALYs resulting from changes in disease outcomes.

Changes in QALYs can be converted into monetised QALYs using a conversion of how much society values a QALY. This model assumes the monetary value for a QALY to be £25,000 [20]. Therefore, the increase in QALYs was multiplied by £25,000 to produce the monetised QALY from the implementation of the salt and sugar tax. However, monetary values occurring in the future need to be discounted in order to reflect both pure time preference (a preference for something to come at one point in time rather than another merely because of when it occurs in time), and the diminished marginal utility of income (the change in human satisfaction resulting from an increase or decrease in an individual's income). These are combined with the assumption that real incomes rise over time. Hence, similar to the DHSC model and that recommended by the UK Treasury [21], a discount rate of 1.5% to total monetary gains was applied as a cumulative multiplier to model outputs.

## **Results**

### *Health impacts and associated monetary gains*

The results of the health impact modelling show that average life expectancy in the UK could increase by up to 4.9 months if salt and sugar consumption was reduced (Table 5). Figure 3 displays the number of YLG each year up to year 25 for the four modelled scenarios. The results show that the cumulative number of YLG saved over 25 years could amount to over 3,400,000. Approximately 96% of the total YLG are due to reduced risks of mortality from cardiovascular diseases (ischemic heart disease, ischemic stroke, intracerebral/subarachnoid haemorrhage, hypertensive heart disease, atrial fibrillation and flutter, (no data shown)). Slightly over half of these gains (54%) can be attributed to the reduction of sugar consumption (both direct and indirect pathways) and more than half of those impacts can be ascribed to a reduced BMI in the UK population (Figure 4). Table 5 also displays annual reductions in disease cases over 25 years. It shows that the salt and sugar tax could result in up to approximately 1000,000, 571,000, 12,000, and 250,000 fewer cases of cardiovascular disease, type 2 diabetes, cancers, and respiratory disease, respectively. Combined, health gains from reduced mortality and morbidity would amount to over 3.7 million QALYs (worth over £77bn).

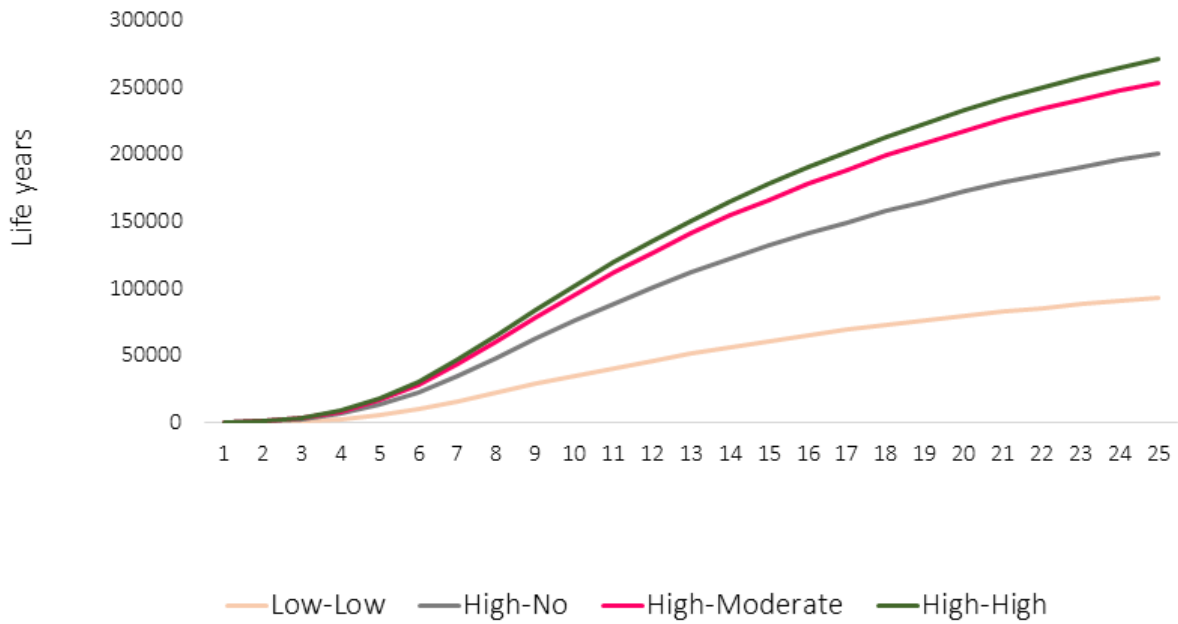

**Figure 3.** Years of life gained each year up to year 25 for the four modelled scenarios.

**Table 5.** Results from life table modelling based on mortality and morbidity, combining health impacts from both reduced salt and sugar consumption.

| <b>Outputs</b>                                                 | <b>Low-Low</b> | <b>High-No</b> | <b>High-Moderate</b> | <b>High-High</b> |
|----------------------------------------------------------------|----------------|----------------|----------------------|------------------|
| Changes in life expectancy UK population (months) <sup>a</sup> | 1.7            | 3.6            | 4.5                  | 4.9              |
| Total YLG accumulated over 25 years <sup>a</sup>               | 1 185 716      | 2 561 406      | 3 229 968            | 3 452 691        |
| Reduction in cases of disease over 25 years                    |                |                |                      |                  |
| Cardiovascular disease <sup>b</sup>                            | -348 887       | -742 739       | -942 611             | -1 012 056       |
| Diabetes                                                       | -208 093       | -374 105       | -523 513             | -571 310         |
| Cancers                                                        | -4 271         | -6 837         | -10 459              | -11 812          |
| Respiratory disease                                            | -90 605        | -165 521       | -230 354             | -249 126         |
| Total QALYs accumulated over 25 years <sup>c</sup>             | 1 276 467      | 2 743 742      | 3 469 136            | 3 710 765        |
| Total associated monetary gain (£, in billions) <sup>d</sup>   | 26.8           | 57.6           | 72.8                 | 77.9             |

<sup>a</sup>Based on changes in mortality.

<sup>b</sup>IHD, ischemic stroke, intracerebral/subarachnoid haemorrhage, hypertensive heart disease, atrial fibrillation and flutter.

<sup>c</sup>Based on changes in both mortality and morbidity.

<sup>d</sup>Based on both changes in mortality and morbidity, and on an estimated total saving of £25,000 per QALY with a 1.5% discount rate [20].

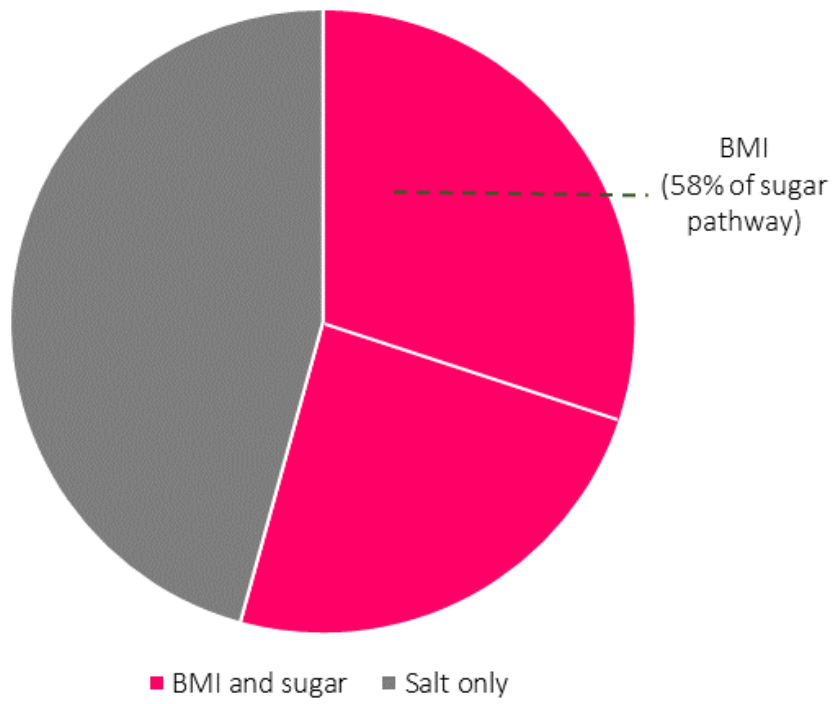

**Figure 4.** Share of impacts attributed to each risk factor (example from High-High scenario).

## **Discussion/Conclusions**

The results of this modelling show that extending the current soft drinks levy to other foods high in sugar and adding a tax on salt could lead to significant health and economic benefits for the UK. Life expectancy in the UK could be increased by between 1.7 months and nearly 5 months, depending on the degree of industry and consumer response to the tax. The tax could also lead to almost 2 million fewer cases of preventable chronic diseases over 25 years. In addition, economic benefits of approximately £27 to £78 billion from avoided ill-health could be achieved by introducing the proposed tax. The main part of these gains can be attributed to reduced mortality and morbidity from cardiovascular diseases, which remain the commonest causes of death and disability in the UK and are strongly associated with consumption of salt and sugar. These benefit estimates are not definitive and carry significant uncertainty. Nevertheless, they should help gauge the order of magnitude of health benefits that might be expected, and the degree of sensitivity to underlying assumptions.

## References

1. Afshin A, Sur PJ, Fay KA, et al (2019) Health effects of dietary risks in 195 countries, 1990–2017: a systematic analysis for the Global Burden of Disease Study 2017. *The Lancet*. [https://doi.org/10.1016/S0140-6736\(19\)30041-8](https://doi.org/10.1016/S0140-6736(19)30041-8)
2. Janssen F, Bardoutsos A, Vidra N (2020) Obesity Prevalence in the Long-Term Future in 18 European Countries and in the USA. *Obes Facts* 13:514–527
3. Hofmarcher T, Lindgren P, Wilking N, Jönsson B (2020) The cost of cancer in Europe 2018. *Eur J Cancer* 129:41–49
4. Dimbelby H (2021) *The National Food Strategy: The Plan*.
5. Griffith R, Jenneson V, James J, Taylor A (2021) *The impact of a tax on added sugar and salt*. Institute for Fiscal Studies, UKRI - Economic and Social Research Council
6. (2018) Department of Health and Social Care (DHSC) Calorie Model. Global and Public Health Group/ Obesity Branch/Childhood Obesity Team/10800
7. Vos T, Lim SS, Abbafati C, et al (2020) Global burden of 369 diseases and injuries in 204 countries and territories, 1990–2019: a systematic analysis for the Global Burden of Disease Study 2019. *The Lancet* 396:1204–1222
8. Hendriksen MAH, van Raaij JMA, Geleijnse JM, Breda J, Boshuizen HC (2015) Health Gain by Salt Reduction in Europe: A Modelling Study. *PLOS ONE* 10:e0118873
9. Stanhope KL (2016) Sugar consumption, metabolic disease and obesity: The state of the controversy. *Crit Rev Clin Lab Sci* 53:52–67
10. Hall KD, Sacks G, Chandramohan D, Chow CC, Wang YC, Gortmaker SL, Swinburn BA (2011) Quantification of the effect of energy imbalance on bodyweight. *The Lancet* 378:826–837
11. NDNS: time trend and income analyses for Years 1 to 9. Public Health England (2019)
12. Srs1 Software LLC. SRS1 cubic spline for Microsoft Excel v2.5 for Windows. Massachusetts: Srs1 Software LLC; 2015.
13. Milner J, Green R, Dangour AD, Haines A, Chalabi Z, Spadaro J, Markandya A, Wilkinson P (2015) Health effects of adopting low greenhouse gas emission diets in the UK. *BMJ Open* 5:e007364
14. Miller BG (2003) Life table methods for quantitative impact assessments in chronic mortality. *J Epidemiol Community Health* 57:200–206
15. R Core Team (2021) *R: A language and environment for statistical computing*.
16. Nomis - Official Labour Market Statistics - Nomis - Official Labour Market Statistics. <https://www.nomisweb.co.uk/query/construct/summary.asp?mode=construct&version=0&dataset=2002>. Accessed 18 Apr 2020
17. GBD Results Tool | GHDx. <http://ghdx.healthdata.org/gbd-results-tool>. Accessed 18 Apr 2020

18. Bandy LK, Scarborough P, Harrington RA, Rayner M, Jebb SA (2020) Reductions in sugar sales from soft drinks in the UK from 2015 to 2018. *BMC Med* 18:20
19. Public Health England (2018) Guidance: Economic evaluation. <https://www.gov.uk/government/publications/evaluation-in-health-and-well-being-overview/economic-evaluation>. Accessed 10 Jun 2021
20. Methods for the development of NICE public health guidance (2012) Third edition. National Institute for Health and Care Excellence, London
21. HM Treasury (2018) HM Treasury. The green book: central government advice on appraisal and evaluation.
